# Supplementary material for: EROS is a selective chaperone regulating the phagocyte NADPH oxidase and purinergic signalling
Source: eLife. 2022 Nov 24;11:e76387. doi: 10.7554/eLife.76387 (PMC9767466; doi:10.7554/eLife.76387)
Supplement: Figure 3—source data 1. [file elife-76387-fig3-data1.xlsx]

## Sheet: 8507_matrix_ExpI-!V
Figure 3 - Source data 1
Accession ID	Gene name	BCbait_FC_A	BCbait_FC_B	BCbait_SP	IP_BC_04	IP_BC_03	IP_BC_02	IP_BC_01	IP_BCcontrol_04	IP_BCcontrol_03	IP_BCcontrol_02	IP_BCcontrol_01	Mw (kDa)	emPAIsemi
Q3TYS2	Cybc1	27.11	20.57	1	308	151	151	137	8	2	0	0	20.9	8.93541
Q64310	Surf4	39.56	39.42	1	40	22	20	23	0	0	0	0	30.4	0.863487
P67778	Phb	36.47	35.68	1	38	16	21	21	0	0	0	0	29.8	0.805369
Q99JB2	Stoml2	30.5	27.15	1	59	12	11	11	0	0	0	0	38.4	0.605469
P14733	Lmnb1	19.28	14.67	1	21	41	29	29	0	3	3	2	66.7	0.449775
P56480	Atp5f1b	17.48	13.73	1	14	24	19	27	0	2	1	2	56.3	0.373002
Q8CAQ8	Immt	39.7	35.76	1	76	17	13	16	0	0	0	0	83.8	0.363962
P15864	Hist1h1c	13.24	10.57	1	5	4	4	18	0	0	0	0	21.3	0.36385
O55143	Atp2a2	15.87	12.49	1	46	50	26	31	0	2	4	7	114.8	0.333188
E9PVA8	Gcn1	144.36	139.71	1	110	117	49	109	0	0	0	0	292.8	0.328723
Q03265	Atp5f1a	6	5.35	1	21	16	17	21	1	6	6	3	59.7	0.31407
Q8BPU7	Elmo1	19.01	16.26	1	46	20	12	17	0	2	2	0	83.9	0.283075
Q921L3	Tmco1	8.9	8.74	1	11	4	3	5	0	0	0	0	21.2	0.271226
Q8BKC5	Ipo5	40.32	38.91	1	61	22	15	19	0	0	0	0	123.5	0.236842
Q8BMK4	Ckap4	15.02	12.63	1	8	13	12	15	0	2	0	0	63.7	0.188383
Q91X78	Erlin1	11.35	11.2	1	10	5	5	8	0	0	0	0	39.2	0.178571
Q3U9G9	Lbr	16.21	13.42	1	35	6	5	4	0	0	0	0	71.4	0.17507
Q8BMS1	Hadha	17.14	13.98	1	8	20	12	17	0	0	1	1	82.6	0.172518
P21619	Lmnb2	15.18	13.32	1	8	11	11	13	0	0	0	1	67.3	0.159733
Q5XG71	Utp20	31.54	25.46	1	92	42	17	48	0	2	3	1	317.5	0.156693
Q91YQ5	Rpn1	16.93	16.52	1	11	12	9	9	0	0	0	0	68.5	0.149635
Q8C3J5	Dock2	40.85	32.11	1	12	43	19	43	0	1	0	0	211.6	0.138233
O35250	Exoc7	15.49	13.57	1	26	8	7	3	0	0	0	0	79.9	0.137672
Q61263	Soat1	15.54	12.94	1	3	11	10	10	0	0	0	0	63.8	0.133229
Q8BHL5	Elmo2	15.13	14.12	1	25	6	6	6	0	0	0	0	83.8	0.128282
P55096	Abcd3	12.79	11.44	1	22	4	3	8	0	0	0	0	75.4	0.122679
A2A5R2	Arfgef2	33.67	32.4	1	42	19	9	25	0	0	0	0	202.1	0.117516
Q9JJY4	Ddx20	15.31	14.47	1	20	12	5	5	0	0	0	0	91.7	0.114504
Q9CRT8	Xpot	14.83	14.06	1	17	13	4	6	0	0	0	0	109.7	0.0911577
Q99JY0	Hadhb	8.3	7.75	1	3	5	4	6	0	0	0	0	51.4	0.0875486
Q6P5F9	Xpo1	14.55	13.35	1	11	16	4	6	0	0	0	0	123	0.0752033
P17809	Slc2a1	6.88	6.84	1	6	4	3	3	0	0	0	0	53.9	0.0742115
P57787	Slc16a3	6.54	6.25	1	3	5	3	3	0	0	0	0	50.3	0.0695825
G3X9K3	Arfgef1	21.25	20.77	1	24	14	6	14	0	0	0	0	208.4	0.0695777
Q9Z160	Cog1	9.9	9.61	1	7	8	3	6	0	0	0	0	109	0.0550459
Q9ESJ0	Xpo4	10.49	10.39	1	12	5	4	6	0	0	0	0	129.9	0.051963
Q9EPL8	Ipo7	8.88	8.51	1	12	4	4	3	0	0	0	0	119.4	0.0481575
Q9JLN9	Mtor	20.46	17.96	1	16	17	3	18	0	0	0	0	288.6	0.0467775
A2AN08	Ubr4	29.68	16.94	1	91	6	4	5	0	0	0	0	571.9	0.0463368
O35129	Phb2	14.75	11.44	0.99	20	2	3	16	0	0	0	0	33.3	0.307808
Q8BGH2	Samm50	12.65	9.25	0.99	32	4	2	3	0	0	0	0	51.8	0.197876
Q8VEM8	Slc25a3	7.6	7.09	0.99	10	3	4	2	0	0	0	0	39.6	0.119949
Q9Z1M0	P2rx7	8.96	8.31	0.99	12	7	2	3	0	0	0	0	68.3	0.0878477
O54734	Ddost	7.32	6.81	0.99	5	4	5	2	0	0	0	0	49	0.0816327
Q8BGS7	Cept1	6.65	6.45	0.99	4	4	2	5	0	0	0	0	46.4	0.080819
Q3TBT3	Tmem173	6.15	5.96	0.99	3	4	3	3	0	0	0	0	42.8	0.0759346
P51675	Ccr1	5.77	5.5	0.99	3	2	3	4	0	0	0	0	40.9	0.0733496
Q922J9	Far1	6.5	6.35	0.99	5	3	2	5	0	0	0	0	59.4	0.0631313
Q8JZQ2	Afg3l2	6.08	5.94	0.99	6	3	3	2	0	0	0	0	89.5	0.0391061
Q7TMY7	Ipo8	6.77	6.19	0.99	3	7	2	3	0	0	0	0	117	0.0320513
Q9JKK8	Atr	13.49	10.06	0.99	2	11	3	15	0	0	0	0	300	0.0258333
Q80WQ2	Vac14	21.74	12.09	0.98	63	9	2	2	0	0	0	0	88	0.215909
Q9DBG6	Rpn2	5.78	5.64	0.98	7	3	2	2	0	0	0	0	69	0.0507246
Q91YE6	Ipo9	7.33	6.32	0.98	2	8	2	4	0	0	0	0	116	0.0344828
Q9R049	Amfr	5.12	4.82	0.98	2	2	3	3	0	0	0	0	73.1	0.0341997
Q921L5	Cog2	6.6	5.87	0.97	12	2	2	2	0	0	0	0	82	0.054878
P70168	Kpnb1	8.08	6.98	0.94	13	8	2	3	0	1	0	0	97.1	0.0669413
Q8VDN2	Atp1a1	7.73	6.13	0.92	17	20	7	12	0	3	3	3	112.9	0.124004
E9Q9A9	Oas2	4.66	4.31	0.9	5	4	2	2	0	0	0	1	85	0.0382353
